# Supplementary material for: Prediction of breast cancer risk based on common genetic variants in women of East Asian ancestry
Source: Springer Nature journal article supplement (doi:10.1186/s13058-016-0786-1), 2016-12-01
Supplement: MOESM1 [file 11807756]

**Table S1. Participating studies in this analysis**

| Study           | Population        | Case          | Control       | Total         |
|-----------------|-------------------|---------------|---------------|---------------|
| <b>BCAC</b>     |                   |               |               |               |
| ACP             | Thai              | 423           | 636           | 1059          |
| HERPACC         | Japanese          | 694           | 1376          | 2070          |
| LAABC           | Japanese/Chinese  | 812           | 990           | 1802          |
| MYBRCA          | Chinese/Malaysian | 770           | 610           | 1380          |
| SBCGS           | Chinese           | 848           | 892           | 1740          |
| SEBCS           | Korean            | 1162          | 1129          | 2291          |
| SGBCC           | Chinese/Malaysian | 533           | 502           | 1035          |
| TBCS            | Thai              | 138           | 253           | 391           |
| TWBCS           | Chinese           | 889           | 236           | 1125          |
| <b>Shanghai</b> |                   |               |               |               |
| SGWAS           | Chinese           | 2867          | 2285          | 5152          |
| SGWAS_stage2    | Chinese           | 2769          | 2753          | 5522          |
| <b>Total</b>    |                   | <b>11 905</b> | <b>11 662</b> | <b>23 567</b> |
