# Supplementary material for: Prediction of breast cancer risk based on common genetic variants in women of East Asian ancestry
Source: Springer Nature journal article supplement (doi:10.1186/s13058-016-0786-1), 2016-12-01
Supplement: MOESM2 [file 11807756]

**Table S2. The Association between selected SNPs and breast cancer risk in East Asian women.**

| Chr                                                              | Position  | SNP        | gene         | EA <sup>a</sup> | OA <sup>a</sup> | East Asian women |        |       |       | European women |                             |
|------------------------------------------------------------------|-----------|------------|--------------|-----------------|-----------------|------------------|--------|-------|-------|----------------|-----------------------------|
|                                                                  |           |            |              |                 |                 | EA <sup>a</sup>  | Number | beta  | se    | One-sided P    | beta (95 % CI) <sup>b</sup> |
| 44 SNPs used for the construction of the polygenic genetic score |           |            |              |                 |                 |                  |        |       |       |                |                             |
| 1                                                                | 10566215  | rs616488   | PEX14        | A               | G               | 0.70             | 23564  | 0.070 | 0.020 | 2.96E-04       | 0.058(0.038-0.077)          |
| 1                                                                | 121280613 | rs11249433 | EMBP1        | G               | A               | 0.08             | 23566  | 0.088 | 0.052 | 4.51E-02       | 0.093(0.073-0.112)          |
| 1                                                                | 203766331 | rs4951011  | ZC3H11A      | G               | A               | 0.31             | 23567  | 0.056 | 0.021 | 3.47E-03       | 0.034(0.006-0.063)          |
| 2                                                                | 19320803  | rs12710696 | MIR4757      | T               | C               | 0.33             | 18044  | 0.048 | 0.023 | 1.91E-02       | 0.039(0.019-0.058)          |
| 2                                                                | 121245122 | rs4849887  | LOC84931     | C               | T               | 0.80             | 23567  | 0.065 | 0.024 | 2.97E-03       | 0.100(0.068-0.132)          |
| 2                                                                | 202143928 | rs10931936 | CASP8        | T               | C               | 0.29             | 18045  | 0.053 | 0.024 | 1.30E-02       | 0.042(0.021-0.062)          |
| 2                                                                | 217905832 | rs13387042 | TNP1         | A               | G               | 0.12             | 23567  | 0.056 | 0.029 | 2.87E-02       | 0.132(0.114-0.151)          |
| 2                                                                | 218296508 | rs16857609 | DIRC3        | T               | C               | 0.60             | 23563  | 0.084 | 0.019 | 6.80E-06       | 0.079(0.058-0.100)          |
| 3                                                                | 27416013  | rs4973768  | SLC4A7       | T               | C               | 0.21             | 23564  | 0.107 | 0.023 | 1.79E-06       | 0.094(0.075-0.113)          |
| 3                                                                | 30682939  | rs12493607 | GFBR2        | C               | G               | 0.67             | 18044  | 0.050 | 0.023 | 1.62E-02       | 0.054(0.035-0.073)          |
| 4                                                                | 175846426 | rs6828523  | ADAM29       | C               | A               | 0.75             | 18044  | 0.058 | 0.025 | 9.25E-03       | 0.108(0.079-0.137)          |
| 5                                                                | 1279790   | rs10069690 | TERT         | T               | C               | 0.20             | 23562  | 0.065 | 0.026 | 6.40E-03       | 0.059(0.038-0.080)          |
| 5                                                                | 44706498  | rs10941679 | MRPS30       | G               | A               | 0.50             | 18045  | 0.067 | 0.022 | 1.26E-03       | 0.120(0.099-0.141)          |
| 5                                                                | 56031884  | rs889312   | MAP3K1       | C               | A               | 0.55             | 23564  | 0.038 | 0.019 | 2.22E-02       | 0.115(0.095-0.136)          |
| 5                                                                | 90732225  | rs10474352 | LOC100129716 | C               | T               | 0.55             | 23567  | 0.077 | 0.020 | 5.60E-05       | 0.058(0.027-0.088)          |
| 5                                                                | 158244083 | rs1432679  | EBF1         | C               | T               | 0.65             | 23567  | 0.068 | 0.020 | 3.26E-04       | 0.070(0.051-0.089)          |
| 6                                                                | 149608874 | rs9485372  | TAB2         | G               | A               | 0.58             | 18045  | 0.128 | 0.022 | 3.96E-09       | 0.048(0.024-0.073)          |
| 6                                                                | 151948366 | rs2046210  | C6orf97      | A               | G               | 0.38             | 23567  | 0.237 | 0.020 | 0.00E+00       | 0.078(0.058-0.097)          |
| 8                                                                | 29509616  | rs9693444  | C8orf75      | A               | C               | 0.29             | 23566  | 0.074 | 0.021 | 1.80E-04       | 0.068(0.048-0.087)          |
| 8                                                                | 76230301  | rs6472903  | HNF4G        | T               | G               | 0.96             | 23567  | 0.118 | 0.049 | 7.80E-03       | 0.095(0.070-0.120)          |
| 8                                                                | 128387852 | rs1562430  | POU5F1B      | T               | C               | 0.83             | 23567  | 0.067 | 0.025 | 3.85E-03       | 0.106(0.087-0.125)          |
| 9                                                                | 22062134  | rs1011970  | CDKN2B-AS1   | T               | G               | 0.09             | 23566  | 0.063 | 0.033 | 2.66E-02       | 0.054(0.029-0.079)          |
| 9                                                                | 110306115 | rs10759243 | 9q31.2       | A               | C               | 0.44             | 18045  | 0.057 | 0.022 | 4.36E-03       | 0.048(0.028-0.069)          |
| 10                                                               | 64251977  | rs10822013 | ZNF365       | T               | C               | 0.50             | 23567  | 0.075 | 0.019 | 3.48E-05       | 0.063(0.044-0.082)          |
| 10                                                               | 80841148  | rs704010   | ZMIZ1        | T               | C               | 0.32             | 23564  | 0.063 | 0.020 | 9.35E-04       | 0.081(0.062-0.100)          |

|            |           |            |            |   |   |      |       |        |       |          |                     |
|------------|-----------|------------|------------|---|---|------|-------|--------|-------|----------|---------------------|
| 10         | 123093901 | rs11199914 | 10q26.12   | C | T | 0.62 | 18045 | 0.042  | 0.022 | 3.07E-02 | 0.051(0.031-0.071)  |
| 10         | 123337335 | rs2981579  | FGFR2      | A | G | 0.46 | 23567 | 0.151  | 0.019 | 1.34E-15 | 0.236(0.217-0.255)  |
| 11         | 1941946   | rs909116   | TNNT3      | T | C | 0.39 | 23555 | 0.075  | 0.020 | 1.09E-04 | 0.070(0.051-0.089)  |
| 11         | 69328764  | rs614367   | CCND1      | T | C | 0.01 | 23565 | 0.249  | 0.094 | 4.02E-03 | 0.194(0.169-0.220)  |
| 11         | 129473690 | rs7107217  | BARX2      | C | A | 0.37 | 18040 | 0.095  | 0.023 | 1.25E-05 | 0.045(0.026-0.063)  |
| 12         | 14413931  | rs12422552 | ATF7IP     | C | G | 0.29 | 18043 | 0.054  | 0.024 | 1.36E-02 | 0.042(0.021-0.063)  |
| 12         | 28155080  | rs10771399 | PTHLH      | A | G | 0.82 | 23567 | 0.112  | 0.024 | 2.09E-06 | 0.159(0.130-0.189)  |
| 12         | 96027759  | rs17356907 | NTN4       | A | G | 0.76 | 23567 | 0.063  | 0.022 | 2.21E-03 | 0.093(0.073-0.114)  |
| 12         | 115836522 | rs1292011  | MED13L     | A | G | 0.75 | 23566 | 0.117  | 0.022 | 4.95E-08 | 0.084(0.065-0.103)  |
| 14         | 37132769  | rs2236007  | PAX9       | G | A | 0.72 | 23561 | 0.071  | 0.021 | 4.22E-04 | 0.076(0.053-0.099)  |
| 14         | 91841069  | rs941764   | CCDC88C    | G | A | 0.15 | 23565 | 0.062  | 0.027 | 9.55E-03 | 0.063(0.043-0.082)  |
| 15         | 91512067  | rs2290203  | PRC1       | G | A | 0.51 | 18045 | 0.081  | 0.022 | 8.15E-05 | 0.039(0.015-0.062)  |
| 16         | 52586341  | rs3803662  | LOC643714  | A | G | 0.63 | 23565 | 0.129  | 0.020 | 2.64E-11 | 0.215(0.194-0.236)  |
| 16         | 52599188  | rs4784227  | LOC643714  | T | C | 0.27 | 23567 | 0.209  | 0.022 | 0.00E+00 | 0.227(0.206-0.249)  |
| 16         | 53855291  | rs11075995 | FTO        | A | T | 0.31 | 18044 | 0.071  | 0.024 | 1.19E-03 | 0.043(0.021-0.065)  |
| 18         | 24337424  | rs527616   | LOC728606  | G | C | 0.71 | 23566 | 0.042  | 0.021 | 2.27E-02 | 0.054(0.035-0.073)  |
| 19         | 17394124  | rs2363956  | ANKLE1     | T | G | 0.68 | 23562 | 0.057  | 0.021 | 2.88E-03 | 0.027(0.008-0.045)  |
| 19         | 18571141  | rs4808801  | ELL        | A | G | 0.75 | 23561 | 0.055  | 0.022 | 5.65E-03 | 0.078(0.058-0.098)  |
| 22         | 39358037  | rs12628403 | APOBEC3A   | C | A | 0.34 | 23561 | 0.108  | 0.024 | 4.56E-06 | 0.051(0.011-0.091)  |
| Other SNPs |           |            |            |   |   |      |       |        |       |          |                     |
| 1          | 114448389 | rs11552449 | DCLRE1B    | T | C | 0.60 | 23566 | 0.018  | 0.020 | 1.88E-01 | 0.066(0.041-0.091)  |
| 1          | 202187176 | rs6678914  | LGR6       | G | A | 0.77 | 18044 | 0.012  | 0.026 | 3.19E-01 | 0.009(-0.010-0.028) |
| 1          | 204518842 | rs4245739  | MDM4       | C | A | 0.05 | 18043 | -0.037 | 0.051 | 7.67E-01 | 0.033(0.012-0.054)  |
| 2          | 172972971 | rs2016394  | METAP1D    | G | A | 0.79 | 18045 | 0.016  | 0.028 | 2.87E-01 | 0.044(0.025-0.062)  |
| 2          | 174212894 | rs1550623  | CDCA7      | A | G | 0.98 | 18040 | 0.140  | 0.092 | 6.35E-02 | 0.060(0.034-0.086)  |
| 2          | 202149589 | rs1045485  | CASP8      | G | C | 1.00 | 23565 | -0.178 | 0.303 | 7.21E-01 | 0.030(0.002-0.058)  |
| 3          | 4742276   | rs6762644  | ITPR1/EGOT | G | A | 0.09 | 23566 | 0.039  | 0.034 | 1.22E-01 | 0.066(0.047-0.085)  |
| 4          | 106084778 | rs9790517  | TET2       | T | C | 0.60 | 18043 | 0.010  | 0.022 | 3.24E-01 | 0.057(0.035-0.080)  |
| 5          | 44899885  | rs9790879  | MRPS30     | T | C | 0.44 | 18042 | -0.041 | 0.022 | 9.69E-01 | 0.085(0.066-0.104)  |
| 5          | 58184061  | rs10472076 | RAB3C      | C | T | 0.26 | 23566 | 0.011  | 0.022 | 2.99E-01 | 0.043(0.023-0.062)  |
| 5          | 58337481  | rs1353747  | PDE4D      | T | G | 1.00 | 18045 | 0.204  | 0.187 | 1.38E-01 | 0.074(0.042-0.106)  |

|    |           |            |              |   |   |      |       |        |       |          |                     |
|----|-----------|------------|--------------|---|---|------|-------|--------|-------|----------|---------------------|
| 6  | 1318878   | rs11242675 | FOXQ1        | T | C | 0.45 | 23566 | -0.019 | 0.019 | 8.47E-01 | 0.038(0.019-0.058)  |
| 6  | 13722523  | rs204247   | RANBP9       | G | A | 0.60 | 23566 | 0.023  | 0.019 | 1.16E-01 | 0.047(0.028-0.066)  |
| 6  | 82193109  | rs17530068 | FAM46A       | C | T | 0.22 | 23567 | 0.031  | 0.023 | 8.35E-02 | 0.054(0.032-0.076)  |
| 6  | 151914113 | rs3757318  | C6orf97      | A | G | 0.28 | 23566 | 0.167  | 0.022 | 4.11E-15 | 0.146(0.110-0.181)  |
| 7  | 144074929 | rs720475   | ARHGEF5/NOBO | G | A | 0.96 | 18045 | 0.025  | 0.059 | 3.36E-01 | 0.059(0.037-0.081)  |
| 8  | 76417937  | rs2943559  | HNF4G        | G | A | 0.09 | 18045 | -0.038 | 0.039 | 8.38E-01 | 0.128(0.093-0.163)  |
| 8  | 128355618 | rs13281615 | POU5F1B      | G | A | 0.52 | 23429 | 0.021  | 0.019 | 1.38E-01 | 0.093(0.074-0.112)  |
| 8  | 129194641 | rs11780156 | MIR1208      | T | C | 0.21 | 18045 | -0.026 | 0.026 | 8.38E-01 | 0.068(0.043-0.093)  |
| 9  | 110888478 | rs865686   | 9q31         | T | G | 0.93 | 23567 | 0.056  | 0.037 | 6.65E-02 | 0.103(0.084-0.123)  |
| 10 | 5886734   | rs2380205  | ANKRD16      | C | T | 0.88 | 18042 | 0.016  | 0.033 | 3.14E-01 | 0.013(-0.006-0.032) |
| 10 | 22032942  | rs7072776  | MLLT10/DNAJ  | A | G | 0.06 | 23567 | 0.002  | 0.045 | 4.81E-01 | 0.062(0.042-0.083)  |
| 10 | 22315843  | rs11814448 | DNAJC1       | C | A | 0.01 | 23567 | 0.064  | 0.096 | 2.53E-01 | 0.238(0.174-0.301)  |
| 10 | 64278682  | rs10995190 | ZNF365       | G | A | 0.98 | 23567 | -0.017 | 0.065 | 6.02E-01 | 0.149(0.123-0.175)  |
| 10 | 114773927 | rs7904519  | TCF7L2       | G | A | 0.07 | 23566 | 0.060  | 0.052 | 1.24E-01 | 0.056(0.037-0.075)  |
| 10 | 123352317 | rs2981582  | FGFR2        | A | G | 0.33 | 23565 | 0.115  | 0.020 | 3.87E-09 | 0.227(0.208-0.246)  |
| 11 | 1909006   | rs3817198  | LSP1         | C | T | 0.14 | 23565 | 0.084  | 0.027 | 1.05E-03 | 0.066(0.046-0.087)  |
| 11 | 65583066  | rs3903072  | OVOL1        | G | T | 0.79 | 18045 | 0.046  | 0.027 | 4.26E-02 | 0.054(0.035-0.073)  |
| 11 | 129461171 | rs11820646 | BARX2        | C | T | 0.54 | 23565 | 0.041  | 0.019 | 1.78E-02 | 0.051(0.032-0.070)  |
| 13 | 32972626  | rs11571833 | BRCA2        | T | A | 0.00 | 23566 | 0.496  | 0.538 | 1.79E-01 | 0.246(0.149-0.343)  |
| 14 | 68660428  | rs2588809  | RAD51L1      | T | C | 0.03 | 23567 | 0.053  | 0.062 | 1.94E-01 | 0.075(0.050-0.101)  |
| 14 | 69034682  | rs999737   | RAD51B       | C | T | 1.00 | 23566 | -0.081 | 0.154 | 7.01E-01 | 0.084(0.061-0.106)  |
| 14 | 69039588  | rs8009944  | RAD51B       | C | A | 0.73 | 18044 | 0.030  | 0.025 | 1.10E-01 | 0.035(0.014-0.056)  |
| 16 | 52548037  | rs12443621 | TOX3         | G | A | 0.57 | 18045 | 0.013  | 0.022 | 2.84E-01 | 0.120(0.101-0.139)  |
| 16 | 53813367  | rs17817449 | MIR1972      | T | G | 0.86 | 23566 | 0.044  | 0.027 | 5.30E-02 | 0.072(0.053-0.091)  |
| 16 | 80650805  | rs13329835 | CDYL2        | G | A | 0.05 | 23567 | 0.058  | 0.042 | 8.55E-02 | 0.078(0.056-0.101)  |
| 17 | 53056471  | rs6504950  | STXBP4/COX1  | G | A | 0.91 | 18045 | -0.010 | 0.038 | 6.00E-01 | 0.062(0.041-0.083)  |
| 18 | 24570667  | rs1436904  | CHST9        | T | G | 0.54 | 23564 | 0.029  | 0.019 | 6.30E-02 | 0.049(0.030-0.068)  |
| 19 | 17389704  | rs8170     | BABAM1       | A | G | 0.01 | 23566 | 0.121  | 0.170 | 2.38E-01 | 0.040(0.016-0.063)  |
| 19 | 44286513  | rs3760982  | KCNN4/ZNF28  | A | G | 0.16 | 23567 | -0.017 | 0.026 | 7.45E-01 | 0.053(0.034-0.071)  |
| 20 | 32588095  | rs2284378  | RALY         | T | C | 0.18 | 18045 | -0.015 | 0.028 | 7.02E-01 | 0.017(-0.003-0.037) |
| 21 | 16520832  | rs2823093  | NRIP1        | G | A | 0.96 | 18045 | 0.068  | 0.055 | 1.09E-01 | 0.075(0.054-0.097)  |

|    |          |           |              |   |   |      |       |       |       |          |                    |
|----|----------|-----------|--------------|---|---|------|-------|-------|-------|----------|--------------------|
| 22 | 29621477 | rs132390  | EMID1/RHBDD3 | C | T | 0.00 | 18045 | 0.038 | 0.271 | 4.44E-01 | 0.123(0.074-0.172) |
| 22 | 40876234 | rs6001930 | MKL1         | C | T | 0.25 | 23566 | 0.022 | 0.022 | 1.55E-01 | 0.117(0.088-0.147) |

<sup>a</sup> Abbreviations: EA, effect allele; OA, other allele; EAF, effect allele frequency.

<sup>b</sup> The association, beta and their 95% confidence intervals, between the selected SNPs and breast cancer risk, estimated from 91,767 women of European ancestry participating in the Breast Cancer Association Consortium [Mavaddat N, Pharoah P, Michailidou K. Prediction of breast cancer risk based on profiling with common genetic variants. *J. Natl. Cancer Inst.* 2015;107(5) djv036].
