# Supplementary material for: Prediction of breast cancer risk based on common genetic variants in women of East Asian ancestry
Source: Springer Nature journal article supplement (doi:10.1186/s13058-016-0786-1), 2016-12-01
Supplement: MOESM3 [file 11807756]

**Table S3. The association between selected SNPs and ER positive breast cancer risk in East Asian women.**

| Chr                                                              | Position  | SNP        | Gene         | EA <sup>a</sup> | OA <sup>a</sup> | EAF <sup>a</sup> | Among ER positive cases and all controls |        |      |        |             |                     |
|------------------------------------------------------------------|-----------|------------|--------------|-----------------|-----------------|------------------|------------------------------------------|--------|------|--------|-------------|---------------------|
|                                                                  |           |            |              |                 |                 |                  | Number                                   | beta   | OR   | se     | one-sided p | Homo_p <sup>b</sup> |
| 44 SNPs used for the construction of the polygenic genetic score |           |            |              |                 |                 |                  |                                          |        |      |        |             |                     |
| 1                                                                | 10566215  | rs616488   | PEX14        | A               | G               | 0.70             | 18306                                    | 0.0614 | 1.06 | 0.0241 | 5.50E-03    | 1.97E-01            |
| 1                                                                | 121280613 | rs11249433 | EMBP1        | G               | A               | 0.08             | 18308                                    | 0.1387 | 1.15 | 0.0611 | 1.17E-02    | 3.61E-01            |
| 1                                                                | 203766331 | rs4951011  | ZC3H11A      | G               | A               | 0.31             | 18309                                    | 0.0446 | 1.05 | 0.0245 | 3.45E-02    | 3.83E-01            |
| 2                                                                | 19320803  | rs12710696 | MIR4757      | T               | C               | 0.33             | 13837                                    | 0.0447 | 1.05 | 0.0276 | 5.30E-02    | 7.17E-01            |
| 2                                                                | 121245122 | rs4849887  | LOC84931     | C               | T               | 0.80             | 18309                                    | 0.0608 | 1.06 | 0.0281 | 1.52E-02    | 5.85E-01            |
| 2                                                                | 202143928 | rs10931936 | CASP8        | T               | C               | 0.29             | 13838                                    | 0.0724 | 1.08 | 0.0282 | 5.15E-03    | 6.60E-01            |
| 2                                                                | 217905832 | rs13387042 | TNP1         | A               | G               | 0.12             | 18309                                    | 0.0738 | 1.08 | 0.0346 | 1.65E-02    | 1.84E-01            |
| 2                                                                | 218296508 | rs16857609 | DIRC3        | T               | C               | 0.60             | 18305                                    | 0.0930 | 1.10 | 0.0228 | 2.19E-05    | 9.02E-01            |
| 3                                                                | 27416013  | rs4973768  | SLC4A7       | T               | C               | 0.21             | 18306                                    | 0.1400 | 1.15 | 0.0273 | 1.43E-07    | 1.37E-01            |
| 3                                                                | 30682939  | rs12493607 | GFBR2        | C               | G               | 0.67             | 13837                                    | 0.0555 | 1.06 | 0.0280 | 2.37E-02    | 5.19E-01            |
| 4                                                                | 175846426 | rs6828523  | ADAM29       | C               | A               | 0.75             | 13837                                    | 0.0786 | 1.08 | 0.0298 | 4.19E-03    | 1.89E-01            |
| 5                                                                | 1279790   | rs10069690 | TERT         | T               | C               | 0.20             | 18304                                    | 0.0320 | 1.03 | 0.0310 | 1.51E-01    | 2.22E-02            |
| 5                                                                | 44706498  | rs10941679 | MRPS30       | G               | A               | 0.50             | 13838                                    | 0.0862 | 1.09 | 0.0266 | 6.10E-04    | 2.10E-02            |
| 5                                                                | 56031884  | rs889312   | MAP3K1       | C               | A               | 0.55             | 18306                                    | 0.0502 | 1.05 | 0.0225 | 1.29E-02    | 2.70E-01            |
| 5                                                                | 90732225  | rs10474352 | LOC100129716 | C               | T               | 0.55             | 18309                                    | 0.0736 | 1.08 | 0.0235 | 8.85E-04    | 5.98E-01            |
| 5                                                                | 158244083 | rs1432679  | EBF1         | C               | T               | 0.65             | 18309                                    | 0.0651 | 1.07 | 0.0236 | 2.96E-03    | 5.68E-01            |
| 6                                                                | 149608874 | rs9485372  | TAB2         | G               | A               | 0.58             | 13838                                    | 0.1073 | 1.11 | 0.0266 | 2.72E-05    | 5.13E-01            |
| 6                                                                | 151948366 | rs2046210  | C6orf97      | A               | G               | 0.38             | 18309                                    | 0.2052 | 1.23 | 0.0231 | 0.00E+00    | 7.67E-03            |
| 8                                                                | 29509616  | rs9693444  | C8orf75      | A               | C               | 0.29             | 18308                                    | 0.0625 | 1.06 | 0.0245 | 5.35E-03    | 8.23E-01            |
| 8                                                                | 76230301  | rs6472903  | HNF4G        | T               | G               | 0.96             | 18309                                    | 0.1416 | 1.15 | 0.0583 | 7.60E-03    | 5.71E-01            |
| 8                                                                | 128387852 | rs1562430  | POU5F1B      | T               | C               | 0.83             | 18309                                    | 0.0575 | 1.06 | 0.0297 | 2.64E-02    | 8.73E-01            |
| 9                                                                | 22062134  | rs1011970  | CDKN2B-AS1   | T               | G               | 0.09             | 18308                                    | 0.0157 | 1.02 | 0.0390 | 3.44E-01    | 1.21E-01            |
| 9                                                                | 110306115 | rs10759243 | 9q31.2       | A               | C               | 0.44             | 13838                                    | 0.0568 | 1.06 | 0.0260 | 1.44E-02    | 6.82E-01            |
| 10                                                               | 64251977  | rs10822013 | ZNF365       | T               | C               | 0.50             | 18309                                    | 0.0707 | 1.07 | 0.0222 | 7.45E-04    | 8.71E-01            |
| 10                                                               | 80841148  | rs704010   | ZMIZ1        | T               | C               | 0.32             | 18306                                    | 0.0665 | 1.07 | 0.0237 | 2.57E-03    | 9.29E-01            |
| 10                                                               | 123093901 | rs11199914 | 10q26.12     | C               | T               | 0.62             | 13838                                    | 0.0737 | 1.08 | 0.0267 | 2.95E-03    | 9.52E-02            |
| 10                                                               | 123337335 | rs2981579  | FGFR2        | A               | G               | 0.46             | 18309                                    | 0.2006 | 1.22 | 0.0226 | 0.00E+00    | 1.42E-03            |
| 11                                                               | 1941946   | rs909116   | TNNT3        | T               | C               | 0.39             | 18297                                    | 0.0708 | 1.07 | 0.0241 | 1.63E-03    | 9.63E-01            |
| 11                                                               | 69328764  | rs614367   | CCND1        | T               | C               | 0.01             | 18307                                    | 0.3645 | 1.44 | 0.1161 | 8.50E-04    | 6.42E-02            |

|            |           |            |              |   |   |      |       |         |      |        |          |          |
|------------|-----------|------------|--------------|---|---|------|-------|---------|------|--------|----------|----------|
| 11         | 129473690 | rs7107217  | BARX2        | C | A | 0.37 | 13833 | 0.0986  | 1.10 | 0.0269 | 1.26E-04 | 8.63E-01 |
| 12         | 14413931  | rs12422552 | ATF7IP       | C | G | 0.29 | 13836 | 0.0881  | 1.09 | 0.0292 | 1.27E-03 | 3.76E-02 |
| 12         | 28155080  | rs10771399 | PTHLH        | A | G | 0.82 | 18309 | 0.0871  | 1.09 | 0.0287 | 1.20E-03 | 3.40E-01 |
| 12         | 96027759  | rs17356907 | NTN4         | A | G | 0.76 | 18309 | 0.0586  | 1.06 | 0.0263 | 1.29E-02 | 7.62E-01 |
| 12         | 115836522 | rs1292011  | MED13L       | A | G | 0.75 | 18308 | 0.1062  | 1.11 | 0.0259 | 2.13E-05 | 3.64E-01 |
| 14         | 37132769  | rs2236007  | PAX9         | G | A | 0.72 | 18303 | 0.0845  | 1.09 | 0.0251 | 3.86E-04 | 6.61E-01 |
| 14         | 91841069  | rs941764   | CCDC88C      | G | A | 0.15 | 18307 | 0.0723  | 1.07 | 0.0315 | 1.08E-02 | 7.13E-01 |
| 15         | 91512067  | rs2290203  | PRC1         | G | A | 0.51 | 13838 | 0.0976  | 1.10 | 0.0258 | 7.70E-05 | 1.15E-01 |
| 16         | 52586341  | rs3803662  | LOC643714    | A | G | 0.63 | 18307 | 0.1516  | 1.16 | 0.0234 | 4.95E-11 | 2.12E-01 |
| 16         | 52599188  | rs4784227  | LOC643714    | T | C | 0.27 | 18309 | 0.2455  | 1.28 | 0.0252 | 0.00E+00 | 2.17E-02 |
| 16         | 53855291  | rs11075995 | FTO          | A | T | 0.31 | 13837 | 0.0736  | 1.08 | 0.0280 | 4.25E-03 | 4.87E-01 |
| 18         | 24337424  | rs527616   | LOC728606    | G | C | 0.71 | 18308 | 0.0622  | 1.06 | 0.0245 | 5.65E-03 | 1.39E-01 |
| 19         | 17394124  | rs2363956  | ANKLE1       | T | G | 0.68 | 18304 | 0.0306  | 1.03 | 0.0243 | 1.04E-01 | 3.03E-02 |
| 19         | 18571141  | rs4808801  | ELL          | A | G | 0.75 | 18303 | 0.0457  | 1.05 | 0.0257 | 3.77E-02 | 6.19E-01 |
| 22         | 39358037  | rs12628403 | APOBEC3A     | C | A | 0.34 | 18303 | 0.1072  | 1.11 | 0.0285 | 8.55E-05 | 9.77E-01 |
| Other SNPs |           |            |              |   |   |      |       |         |      |        |          |          |
| 1          | 114448389 | rs11552449 | DCLRE1B      | T | C | 0.60 | 18308 | 0.0152  | 1.02 | 0.0238 | 2.62E-01 | 6.84E-01 |
| 1          | 202187176 | rs6678914  | LGR6         | G | A | 0.77 | 13837 | -0.0061 | 0.99 | 0.0307 | 5.79E-01 | 3.26E-01 |
| 1          | 204518842 | rs4245739  | MDM4         | C | A | 0.05 | 13836 | -0.0966 | 0.91 | 0.0631 | 9.37E-01 | 4.19E-01 |
| 2          | 172972971 | rs2016394  | METAP1D      | G | A | 0.79 | 13838 | 0.0310  | 1.03 | 0.0336 | 1.78E-01 | 3.89E-01 |
| 2          | 174212894 | rs1550623  | CDCA7        | A | G | 0.98 | 13833 | 0.1980  | 1.22 | 0.1152 | 4.29E-02 | 7.15E-01 |
| 2          | 202149589 | rs1045485  | CASP8        | G | C | 1.00 | 18307 | -0.3171 | 0.73 | 0.3570 | 8.13E-01 | 9.94E-01 |
| 3          | 4742276   | rs6762644  | ITPR1/EGOT   | G | A | 0.09 | 18308 | 0.0535  | 1.05 | 0.0398 | 8.95E-02 | 7.30E-01 |
| 4          | 106084778 | rs9790517  | TET2         | T | C | 0.60 | 13836 | -0.0029 | 1.00 | 0.0265 | 5.43E-01 | 3.65E-01 |
| 5          | 44899885  | rs9790879  | MRPS30       | T | C | 0.44 | 13835 | -0.0519 | 0.95 | 0.0263 | 9.76E-01 | 1.28E-01 |
| 5          | 58184061  | rs10472076 | RAB3C        | C | T | 0.26 | 18308 | 0.0233  | 1.02 | 0.0254 | 1.80E-01 | 3.21E-01 |
| 5          | 58337481  | rs1353747  | PDE4D        | T | G | 1.00 | 13838 | 0.1516  | 1.16 | 0.2386 | 2.63E-01 | 7.00E-01 |
| 6          | 1318878   | rs11242675 | FOXQ1        | T | C | 0.45 | 18308 | -0.0037 | 1.00 | 0.0224 | 5.66E-01 | 1.85E-01 |
| 6          | 13722523  | rs204247   | RANBP9       | G | A | 0.60 | 18308 | 0.0513  | 1.05 | 0.0228 | 1.21E-02 | 2.31E-02 |
| 6          | 82193109  | rs17530068 | FAM46A       | C | T | 0.22 | 18309 | 0.0056  | 1.01 | 0.0270 | 4.19E-01 | 1.77E-01 |
| 6          | 151914113 | rs3757318  | C6orf97      | A | G | 0.28 | 18308 | 0.1569  | 1.17 | 0.0253 | 3.03E-10 | 3.99E-01 |
| 7          | 144074929 | rs720475   | ARHGEF5/NOBO | G | A | 0.96 | 13838 | 0.0638  | 1.07 | 0.0734 | 1.93E-01 | 1.67E-01 |
| 8          | 76417937  | rs2943559  | HNF4G        | G | A | 0.09 | 13838 | -0.0192 | 0.98 | 0.0462 | 6.62E-01 | 5.20E-01 |
| 8          | 128355618 | rs13281615 | POU5F1B      | G | A | 0.52 | 18171 | 0.0187  | 1.02 | 0.0226 | 2.04E-01 | 9.36E-01 |

|    |           |            |              |   |   |      |       |         |      |        |          |          |
|----|-----------|------------|--------------|---|---|------|-------|---------|------|--------|----------|----------|
| 8  | 129194641 | rs11780156 | MIR1208      | T | C | 0.21 | 13838 | -0.0279 | 0.97 | 0.0315 | 8.13E-01 | 9.24E-01 |
| 9  | 110888478 | rs865686   | 9q31         | T | G | 0.93 | 18309 | 0.0536  | 1.06 | 0.0446 | 1.15E-01 | 6.34E-01 |
| 10 | 5886734   | rs2380205  | ANKRD16      | C | T | 0.88 | 13835 | 0.0137  | 1.01 | 0.0403 | 3.67E-01 | 4.49E-01 |
| 10 | 22032942  | rs7072776  | MLLT10/DNAJ  | A | G | 0.06 | 18309 | -0.0210 | 0.98 | 0.0548 | 6.49E-01 | 8.60E-01 |
| 10 | 22315843  | rs11814448 | DNAJC1       | C | A | 0.01 | 18309 | 0.1107  | 1.12 | 0.1136 | 1.65E-01 | 6.25E-01 |
| 10 | 64278682  | rs10995190 | ZNF365       | G | A | 0.98 | 18309 | 0.0639  | 1.07 | 0.0785 | 2.08E-01 | 3.33E-01 |
| 10 | 114773927 | rs7904519  | TCF7L2       | G | A | 0.07 | 18308 | 0.0860  | 1.09 | 0.0633 | 8.75E-02 | 6.68E-01 |
| 10 | 123352317 | rs2981582  | FGFR2        | A | G | 0.33 | 18307 | 0.1714  | 1.19 | 0.0235 | 1.58E-13 | 9.21E-04 |
| 11 | 1909006   | rs3817198  | LSP1         | C | T | 0.14 | 18307 | 0.0822  | 1.09 | 0.0321 | 5.30E-03 | 6.72E-01 |
| 11 | 65583066  | rs3903072  | OVOL1        | G | T | 0.79 | 13838 | 0.0366  | 1.04 | 0.0325 | 1.31E-01 | 7.64E-01 |
| 11 | 129461171 | rs11820646 | BARX2        | C | T | 0.54 | 18307 | 0.0454  | 1.05 | 0.0228 | 2.34E-02 | 9.12E-01 |
| 13 | 32972626  | rs11571833 | BRCA2        | T | A | 0.00 | 18308 | 0.7510  | 2.12 | 0.5573 | 8.90E-02 | 7.81E-01 |
| 14 | 68660428  | rs2588809  | RAD51L1      | T | C | 0.03 | 18309 | 0.0307  | 1.03 | 0.0763 | 3.44E-01 | 7.05E-01 |
| 14 | 69034682  | rs999737   | RAD51B       | C | T | 1.00 | 18308 | -0.1452 | 0.86 | 0.1871 | 7.81E-01 | 9.11E-01 |
| 14 | 69039588  | rs8009944  | RAD51B       | C | A | 0.73 | 13837 | 0.0461  | 1.05 | 0.0298 | 6.10E-02 | 5.08E-01 |
| 16 | 52548037  | rs12443621 | TOX3         | G | A | 0.57 | 13838 | -0.0035 | 1.00 | 0.0262 | 5.54E-01 | 3.85E-02 |
| 16 | 53813367  | rs17817449 | MIR1972      | T | G | 0.86 | 18308 | 0.0357  | 1.04 | 0.0322 | 1.34E-01 | 6.91E-01 |
| 16 | 80650805  | rs13329835 | CDYL2        | G | A | 0.05 | 18309 | 0.0745  | 1.08 | 0.0492 | 6.50E-02 | 7.24E-01 |
| 17 | 53056471  | rs6504950  | STXBP4/COX1  | G | A | 0.91 | 13838 | 0.0168  | 1.02 | 0.0462 | 3.59E-01 | 9.44E-01 |
| 18 | 24570667  | rs1436904  | CHST9        | T | G | 0.54 | 18306 | 0.0285  | 1.03 | 0.0224 | 1.01E-01 | 9.14E-01 |
| 19 | 17389704  | rs8170     | BABAM1       | A | G | 0.01 | 18308 | 0.3214  | 1.38 | 0.2050 | 5.85E-02 | 4.91E-01 |
| 19 | 44286513  | rs3760982  | KCNN4/ZNF28  | A | G | 0.16 | 18309 | 0.0060  | 1.01 | 0.0310 | 4.23E-01 | 9.37E-01 |
| 20 | 32588095  | rs2284378  | RALY         | T | C | 0.18 | 13838 | -0.0427 | 0.96 | 0.0336 | 8.99E-01 | 5.04E-01 |
| 21 | 16520832  | rs2823093  | NRIP1        | G | A | 0.96 | 13838 | 0.1427  | 1.15 | 0.0686 | 1.87E-02 | 1.37E-01 |
| 22 | 29621477  | rs132390   | EMID1/RHBDD3 | C | T | 0.00 | 13838 | 0.1692  | 1.18 | 0.3319 | 3.05E-01 | 5.56E-01 |
| 22 | 40876234  | rs6001930  | MKL1         | C | T | 0.25 | 18308 | 0.0545  | 1.06 | 0.0252 | 1.54E-02 | 2.09E-02 |

<sup>a</sup>Abbreviations: EA, effect allele; OA, other allele; EAF, effect allele frequency.

<sup>b</sup>Homo\_p: p values for homogeneity tests between ER positive and ER negative breast cancer cases.
