# Supplementary material for: Prediction of breast cancer risk based on common genetic variants in women of East Asian ancestry
Source: Springer Nature journal article supplement (doi:10.1186/s13058-016-0786-1), 2016-12-01
Supplement: MOESM5 [file 11807756]

Table S5. Ethics committees that approved participating studies

| <b>Study</b>                                                                   | <b>Country</b> | <b>Approval Committee</b>                                                                                                                                                             |
|--------------------------------------------------------------------------------|----------------|---------------------------------------------------------------------------------------------------------------------------------------------------------------------------------------|
| Asia Cancer Program (ACP)                                                      | Thailand       | University Faculty of Medicine Ethics Committee; Khon Kaen University Ethics Committee for Human Research; HRH Princess Maha Chakri Sirindhorn Medical Centre (MSMC) Ethics Committee |
| Hospital-based Epidemiologic Research Program at Aichi Cancer Center (HERPACC) | Japan          | Ethics Committee for Human Genome Study at Aichi Cancer Center                                                                                                                        |
| Los Angeles County Asian-American Breast Cancer Case-Control Study (LAABC)     | USA            | University of Southern California Health Sciences Campus IRB                                                                                                                          |
| Malaysian Breast Cancer Genetic Study (MYBRCA)                                 | Malaysia       | University Malaya Medical Centre Medical Ethics Committee                                                                                                                             |
| Shanghai Breast Cancer Genetic Study (SBCGS)                                   | China          | Shanghai Cancer Institute, Shanghai Center for Disease Prevention and Control IRB and Vanderbilt University Medical Center IRB                                                        |
| Seoul Breast Cancer Study (SEBCS)                                              | Korea          | Seoul National University College of Medicine/Seoul National University Hospital IRB                                                                                                  |
| Singapore Breast Cancer Cohort (SGBCC)                                         | Singapore      | National Health Group (NHG) Domain Specific Review Board (DSRB)                                                                                                                       |
| IARC-Thai Breast Cancer Study (TBCS)                                           | Thailand       | IARC Institutional Review Board Committee                                                                                                                                             |
| Taiwanese Breast Cancer Study (TWBCS)                                          | Taiwan         | Human Subject Research Ethics Committee/IRB Academia Sinica                                                                                                                           |
| Shanghai Breast Cancer Study (SBCS)                                            | China          | Shanghai Cancer Institute and Vanderbilt University Medical Center IRB                                                                                                                |
| Shanghai Breast Cancer Survival Study (SBCSS)                                  | China          | Shanghai Cancer Institute and Vanderbilt University Medical Center IRB                                                                                                                |
| Shanghai Women's Health Study (SWHS)                                           | China          | Shanghai Cancer Institute and Vanderbilt University Medical Center IRB                                                                                                                |
